# Supplementary material
Source: Research Square preprint supplement (doi:10.21203/rs.3.rs-9750606/v1)
Supplement: Supplementary file 1 [file 3e72b146e12c3fb47c4a772d.docx]

**Autonomous materials discovery through a tabula rasa active learning framework**

**Chih-Yang Cheng1*, Hsin-Ying Ting1, Yi-Huan Wu2*, Feng-Yin Li1***

1Department of Chemistry, National Chung Hsing University, Taichung 402, Taiwan.

2Department of Chemistry, R. O. C. Military Academy, Kaohsiung, Taiwan.

*corresponding author: Chih-Yang Cheng ([mushroom2368@gmail.com](mailto:mushroom2368@gmail.com)), Yi-Huan Wu ([m1090008@rocma.edu.tw](mailto:m1090008@rocma.edu.tw)), Feng-Yin Li ([feng64@nchu.edu.tw](mailto:feng64@nchu.edu.tw))

**Supplementary Information**

**Table S1 | Architecture and training hyperparameters.** Configuration details for the PC-BAN surrogate model and the LCBDS active-learning acquisition framework.

| Component | Parameter | Value |
| --- | --- | --- |
| PC-BAN model | Input features () | 15 |
| --element fractions | 4 |
| --pairwise products | 6 |
| --triple products | 4 |
| --4-body product | 1 |
| Embedding dimension (final tier) | 32 |
| Projection dimension (final tier) | 30 |
| MDN components K (adaptive tiers) | 4 / 6 / 8 / 10 |
| Hidden layers (final tier) | [128, 64] |
| Dropout rate | 0.10 |
| Triplet interaction rank | 4 |
| Adaptive tiers | Tier 0: n < 40 | K=4, hidden=[32, 16] |
| Tier 1: n < 70 | K=6, hidden=[64, 32] |
| Tier 2: n < 120 | K=8, hidden=[96, 48] |
| Tier 3: final) | K=10, hidden=[128, 64] |
| Training | Optimizer | AdamW |
| Weight decay |  |
| Gradient clip | 1.0 |
| Epochs (scratch, tier upgrade) | 250 / 300 |
| Epochs (warm start) | 60 |
| LR (scratch / warm start) |  |
| LR schedule | CosineAnnealing |
| Knowledge distillation | 0.5 |
| Bootstrap ensemble | Number of bootstraps B | 5 |
| MC Dropout passes | 20 |
| Total forward passes per query | 100 |
| LCBDS acquisition | Initial | 2.5 |
| Final | 0.2 |
| Diversity weight | 8.0 mV |
| Surprise weight | 12.0 mV |
| Surprise radius | 0.10 |
| Surprise threshold | 2.0 |
| AL protocol | Initial labeled set | 20 |
| AL iterations | 100 |
| Queries per iteration | 2 |
| Total labeled budget | 220 |
| Discovery threshold | 370 mV |
| Independent seeds | 10 (seeds 0-4, 10-14) |
